# Supplementary material
Source: HighWire-hosted journal article supplement (https://emj.bmj.com/content/36/4/225)
Supplement: inline-supplementary-material-1 [file inline-supplementary-material-1.pdf]

### **Supplementary Table 1: Search terms used for databases**

#### MEDLINE OVID search

1. exp Asthma/
2. (exac\* or acute).mp. [mp=title, abstract, original title, name of substance word, subject heading word, keyword heading word, protocol supplementary concept word, rare disease supplementary concept word, unique identifier]
3. (child\* or ped\* or paed\*).mp. [mp=title, abstract, original title, name of substance word, subject heading word, keyword heading word, protocol supplementary concept word, rare disease supplementary concept word, unique identifier]
4. (IV or intrav\* or intravenous).mp. [mp=title, abstract, original title, name of substance word, subject heading word, keyword heading word, protocol supplementary concept word, rare disease supplementary concept word, unique identifier]
5. 1 and 2 and 3 and 4
6. controlled clinical trial.pt.
7. randomized controlled trial.pt.
8. randomized.ab.
9. placebo.ab.
10. drug therapy.fs.
11. randomly.ab.
12. trial.ab.
13. groups.ab.

14. 6 or 7 or 8 or 9 or 10 or 11 or 12 or 13

15. exp animals/ not humans.sh.

16. 14 not 15

17. 5 and 16

#### **EMBASE OVID**

1. exp asthma/

2. (exac\* or acute).mp. [mp=title, abstract, heading word, drug trade name, original title, device manufacturer, drug manufacturer, device trade name, keyword, floating subheading]

3. (child\* or ped\* or paed\*).mp. [mp=title, abstract, heading word, drug trade name, original title, device manufacturer, drug manufacturer, device trade name, keyword, floating subheading]

4. (IV or intrav\* or intravenous).mp. [mp=title, abstract, heading word, drug trade name, original title, device manufacturer, drug manufacturer, device trade name, keyword, floating subheading]

5. 1 and 2

6. 3 and 5

7. 4 and 6

8. random\$.mp.

9. factorial\$.mp.

10. cross over\$.mp.

11. crossover\$.mp.

12. cross-over\$.mp.

13. placebo\$.mp.

14. (doubl\$ adj blind\$).mp. [mp=title, abstract, heading word, drug trade name, original title, device manufacturer, drug manufacturer, device trade name, keyword, floating subheading]

15. (singl\$ adj blind\$).mp. [mp=title, abstract, heading word, drug trade name, original title, device manufacturer, drug manufacturer, device trade name, keyword, floating subheading]

16. assign\$.mp.

17. allocat\$.mp.

18. volunteer\$.mp.

19. crossover procedure/

20. double blind procedure/ 21. randomised controlled trial/ 22. single blind procedure/

23. 8 or 9 or 10 or 11 or 12 or 13 or 14 or 15 or 16 or 17 or 18 or 19 or 20 or 21 or 22 24. 7 and 23

#### **CENTRAL COCHRANE DATABASE**

**"asthma" in Title, Abstract, Keywords and "child" or "ped" or "paed" and "IV or intravenous" and "exac or acute" (Word variations have been searched)**

#### **International Clinical trials database**

**"asthma" AND "exacerbation" with selection for clinical trials in children**

**Table 2. Trial drugs and comparators used in studies**

| Trial drug    | Vs. Placebo or standard care | Vs. Nebulised Magnesium | Vs. Nebulised ipratropium bromide vs. Intravenous Salbutamol plus Inhaled Ipratropium Bromide | Vs. Intravenous Salbutamol | Vs. Sub cut Adrenaline vs. Nebulised Salbutamol | Two doses vs. one dose | Bolus vs. high dose infusion | Vs. Ketamine | Vs. Terbutaline vs. Terbutaline and Aminophylline | Nebulised Salbutamol vs. Intravenous Albuterol |
|---------------|------------------------------|-------------------------|-----------------------------------------------------------------------------------------------|----------------------------|-------------------------------------------------|------------------------|------------------------------|--------------|---------------------------------------------------|------------------------------------------------|
| Aminophylline | 7                            |                         |                                                                                               | 3                          | 1                                               |                        |                              | 1            | 1                                                 |                                                |
| Magnesium     | 7                            | 2                       | 1                                                                                             | 1                          |                                                 | 1                      | 1                            |              | 1                                                 |                                                |
| Theophylline  | 4                            |                         |                                                                                               |                            |                                                 |                        |                              |              |                                                   |                                                |
| Doxofylline   | 1                            |                         |                                                                                               |                            |                                                 |                        |                              |              |                                                   |                                                |
| Salbutamol    | 2                            |                         | 1                                                                                             |                            |                                                 |                        |                              |              |                                                   | 1                                              |
| Terbutaline   | 1                            |                         |                                                                                               |                            |                                                 |                        |                              |              |                                                   |                                                |
| Ketamine      | 1                            |                         |                                                                                               |                            |                                                 |                        |                              |              |                                                   |                                                |
| Montelukast   | 2                            |                         |                                                                                               |                            |                                                 |                        |                              |              |                                                   |                                                |
| Total         | 25                           | 2                       | 1                                                                                             | 4                          | 1                                               | 1                      | 1                            | 1            | 2                                                 | 1                                              |

Numbers = Number of trials

**Table 3. Treatment drugs and comparator dosing and regime**

| Trial drug    | Bolus then infusion                                                                                                                                                                                             | Bolus only                                                                                                                                                                                                                                                                                                                                                                                | Infusion only                                               | Infusion then oral | Multiple Intravenous drugs                                                                                                                                                                                                                        |
|---------------|-----------------------------------------------------------------------------------------------------------------------------------------------------------------------------------------------------------------|-------------------------------------------------------------------------------------------------------------------------------------------------------------------------------------------------------------------------------------------------------------------------------------------------------------------------------------------------------------------------------------------|-------------------------------------------------------------|--------------------|---------------------------------------------------------------------------------------------------------------------------------------------------------------------------------------------------------------------------------------------------|
| Magnesium     |                                                                                                                                                                                                                 | <p>25mg/kg max 2g over 20min (1, 2)</p> <p>40mg/kg max 2gm over 20min (3, 4)</p> <p>50mg/kg dose over 20min (5)</p> <p>50mg/kg over 20 min vs 3x 2.5ml of nebulised (6)</p> <p>2x bolus vs single bolus (rate and dosing not specified)(7)</p> <p>75mg/kg (Max 2.5mg) over 20min(8)</p> <p>.2ml/kg over 35min (9)</p> <p>3x intermittant bolus (dosing and timing not specified) (10)</p> | <p>Infusion only – timing and dosing not specified (11)</p> |                    | <p>50mg/kg over 20min vs Terbutaline 10micro/kg followed by vs IV Aminophylline 5mg/kg followed by 0.9mg/kg/hr) (12)</p> <p>50mg/kg MgSO4 vs 1mg/kg/min of salbutamol timing not specified(13)</p>                                                |
| Aminophylline | <p>6mg/kg over 10min then 0.8 – 1.0 mg/kg continuous duration not specified (14)</p> <p>7mg/kg -10mg/kg over one hour then 0.7 to 1.1 mg/kg clinicians deciding when to cease (15)</p> <p>7mg/kg bolus then</p> | <p>2x doses 6 hours apart of 5mg/kg(17)</p> <p>5mg/kg over 10min (18)</p> <p>1 vial dose and timing not specified (19)</p>                                                                                                                                                                                                                                                                | <p>Timing and dosage not specified (20)</p>                 |                    | <p>4-6mg/kg (dependent on weight range) over 5min, then 0.7mg/kg -0.9mg/kg of aminophylline versus 5 micro/kg of salbutamol over 5min followed by constant infusion of 5micro/kg per hour (21)</p> <p>4mg/kg bolus then 0.6mg/kg per hour for</p> |

|              |                                                                                                                                                                                                                                                                                                                                                                                                                                       |  |  |                                                                                                              |                                                                                                                                                                                                                                                                                                      |
|--------------|---------------------------------------------------------------------------------------------------------------------------------------------------------------------------------------------------------------------------------------------------------------------------------------------------------------------------------------------------------------------------------------------------------------------------------------|--|--|--------------------------------------------------------------------------------------------------------------|------------------------------------------------------------------------------------------------------------------------------------------------------------------------------------------------------------------------------------------------------------------------------------------------------|
|              | continuous over .75mg – 1.2 mg/kg clinicians deciding when to cease (16)                                                                                                                                                                                                                                                                                                                                                              |  |  |                                                                                                              | <p>24hours of aminophylline versus salbutamol 4 micro/kg (timing not specified) then 0.6micro/kg continuously for 24 hours (22)</p> <p>15micro/kg over 20min then continuous salbutamol infusion dose not specified vs aminophylline bolus of 5mg/kg over 20min then infusion of 0.9mg/kg/hr(23)</p> |
| Theophylline | <p>Bolus 1.6mg/mL (timing not defined) and continuous infusion 1.6mg/ml (24)</p> <p>Bolus over 30 min based on base theophylline level (to achieve target 82.5micro/L), then continuous infusion 0.8 to 1.0mg/kg per hour for 36 hours(25)</p> <p>Bolus of 4.8mg/kg over 20min, followed by rate of .8mg/kg per hour total timing not specified (26)</p> <p>Load of 7mg/kg then infusion range 0.5 – 0.65 timing unspecified (27)</p> |  |  | Initial infusion to maintain levels at 55-110micromol/L then oral therapy plus 2 week oral at discharge (28) | <p>IV Theophylline at 6.4mg/kg over 20min then infusion .64 - .96mg/kg versus Terbutaline 20micro/kg followed by continuous .4micro/kg/min reduced by clinical improvement(29)</p>                                                                                                                   |
| Salbutamol   | 15micro/kg bolus over 10min (30-32)                                                                                                                                                                                                                                                                                                                                                                                                   |  |  |                                                                                                              |                                                                                                                                                                                                                                                                                                      |
| Terbutaline  | Loading dose of 10microgram,/kg per min for 10-20 then continuous of                                                                                                                                                                                                                                                                                                                                                                  |  |  |                                                                                                              |                                                                                                                                                                                                                                                                                                      |

|             |                                                                                                                   |                                                        |  |  |                                                                                                                           |
|-------------|-------------------------------------------------------------------------------------------------------------------|--------------------------------------------------------|--|--|---------------------------------------------------------------------------------------------------------------------------|
| Terbutaline | Loading dose of 10microgram,/kg per min for 10-20 then continuous of 1micro/kg per min duration not specified(33) |                                                        |  |  |                                                                                                                           |
| Ketamine    | .2mg/kg bolus over 1-2min then .5mg/kg per hour continuous infusion for 2 hours (34)                              |                                                        |  |  | 0.5mg/kg ketamine over 20min then infusion 0.6mg/kg/hr for 3 hour vs aminophylline 5mg/kg over 20min then 0.9mg/kg/hr(35) |
| Montelukast |                                                                                                                   | Sinlge 10mg bolus dose (36)<br>5.25mg over 2-5min (37) |  |  |                                                                                                                           |

**Table 4:** Adverse events\* listed as outcome measures by trial medication

| Trial drug    | Number of trials capturing adverse events as an outcome measure<br><b>TOTAL</b> | Specifics of adverse events if described in the paper                                                                                                                                                                                   |
|---------------|---------------------------------------------------------------------------------|-----------------------------------------------------------------------------------------------------------------------------------------------------------------------------------------------------------------------------------------|
| Magnesium     | 6/13 = 45%                                                                      | Dizziness, fatigue, change to body temperature (3)<br>Hypotension, warmth, numbness, respiratory depression (9)<br>Hypotension and vomiting (8)                                                                                         |
| Aminophylline | 9/12 = 75%                                                                      | Stroke volume and cardiac output, Pulses paradoxus (21)<br>Tremor (18)<br>Vomiting, nausea and abdominal pain (23)<br>Arrhythmia (16)<br>Arrhythmia, Vomiting and nausea, Headache, Palpitations (15, 29)                               |
| Theophylline  | 4/4 = 100%                                                                      | Toxicity, insomnia, irritability, vomiting, nausea, headache, seizures (24)<br>Nausea, headache, palpitations, tremor (25)<br>Tremor, wheezing, (26)<br>Vomiting, nausea, abdominal pain, headache, seizures, tremor, irritability (27) |
| Doxofylline   | 1/1 = 100%                                                                      |                                                                                                                                                                                                                                         |
| Salbutamol    | 2/4 = 50%                                                                       | Not specified (32)<br>Vomiting, nausea, headache, seizures, palpitations (30)                                                                                                                                                           |
| Terbutaline   | 1/1 = 100%                                                                      | Arrhythmia(33)                                                                                                                                                                                                                          |
| Ketamine      | 2/2= 100%                                                                       | How the child felt, Nightmares, dysphoria, behavioral change (34)<br>Hypertension (35)                                                                                                                                                  |
| Montelukast   | 0/2 = 0%                                                                        |                                                                                                                                                                                                                                         |

**\*Adverse event: defined as specific mention of a side effect eg hypotension, tremor, wheezing NOT purely listing recording of a change of observation e.g heart rate, respiratory rate, blood pressure**

**Table 5: Full list of outcome measures for each study**

| Study/<br>Year                                                                             | Type | Geographic<br>location | Interventions                                                     | Number<br>of<br>patients<br>and age<br>range | Primary<br>Outcome/s                                                          | Secondary<br>Outcome                                                                                                                         | Other<br>outcomes                                                                                                                                                                                                                                                            |
|--------------------------------------------------------------------------------------------|------|------------------------|-------------------------------------------------------------------|----------------------------------------------|-------------------------------------------------------------------------------|----------------------------------------------------------------------------------------------------------------------------------------------|------------------------------------------------------------------------------------------------------------------------------------------------------------------------------------------------------------------------------------------------------------------------------|
| Allen and<br>Macias,<br>2005 (34)                                                          | RCT  | USA                    | Intravenous<br>Ketamine<br>bolus and<br>infusion vs<br>placebo    | 66<br>2-18 years                             | Reduction<br>of<br>pulmonary<br>index score<br>of 2 points<br>at 2 hours      | Disposition<br>of patients<br>after<br>completion<br>of study                                                                                | Intravenous<br>bronchodilator<br>utilization<br>Need for second<br>line therapies<br>Rate of<br>hospitalization<br>Respiratory rate,<br>Heart rate,<br>Blood pressure,<br>Oxygen<br>saturation<br>How the child<br>felt<br>Nightmares,<br>dysphoria,<br>behavioral<br>change |
| Alansari,<br>2015 (7)<br>Registered<br>clinical<br>trial<br><i>Actively<br/>recruiting</i> | RCT  | Qatar                  | Intravenous<br>Magnesium<br>Sulphate 2x<br>dose vs single<br>dose | 240<br>2 -14<br>years                        | Rate of<br>early<br>discharge<br>from the<br>pediatric<br>emergency<br>centre | Rate of<br>revisits to<br>pediatric<br>emergency<br>centre/prima<br>ry health<br>care<br>Rate of<br>change in<br>clinical<br>asthma<br>score |                                                                                                                                                                                                                                                                              |

|                                                           |     |             |                                               |                    |                                                   |                                                                                                   |                                                                                                                                                                       |
|-----------------------------------------------------------|-----|-------------|-----------------------------------------------|--------------------|---------------------------------------------------|---------------------------------------------------------------------------------------------------|-----------------------------------------------------------------------------------------------------------------------------------------------------------------------|
|                                                           |     |             |                                               |                    |                                                   | Hospital length of stay<br>Pediatric intensive care admission rate                                |                                                                                                                                                                       |
| Bien et al/1995 (24)                                      | RCT | USA         | Intravenous Theophylline vs placebo           | 39<br>2 -10 years  | Pulmonary index score every 7-9 hours for 24hours | Oxygen saturations<br>Toxicity<br>Aerosol requirement                                             | Short acting beta 2 agonist requirement<br>Oxygen saturations<br>Occurrence of arrhythmia<br>Vomiting, nausea, headache, seizures<br>Toxicity, insomnia, irritability |
| Boeschoten/2017(32)<br>Clinical Trial Registry Recruiting | RCT | Netherlands | Intravenous bolus salbutamol vs standard care | 56<br>2 – 18 years | Clinical asthma score not specified               | PICU length of stay,<br>Adverse event<br>Need for mechanical ventilation                          |                                                                                                                                                                       |
| Bogie et al/2007 (33)                                     | RCT | USA         | Intravenous Terbutaline vs placebo            | 49<br>2-17 years   | Modified CASS score mean improvement over 24hours | Length of treatment with continuous nebulized albuterol<br>Intravenous bronchodilator utilization | Electrolytes, lactate, troponin                                                                                                                                       |

|                         |     |           |                                                                                                                    |                       |                                                                                                                                                                               |                                                                                                  |                                                                                                                                                                                                                                   |
|-------------------------|-----|-----------|--------------------------------------------------------------------------------------------------------------------|-----------------------|-------------------------------------------------------------------------------------------------------------------------------------------------------------------------------|--------------------------------------------------------------------------------------------------|-----------------------------------------------------------------------------------------------------------------------------------------------------------------------------------------------------------------------------------|
|                         |     |           |                                                                                                                    |                       |                                                                                                                                                                               | Intubation<br>Arrhythmia<br>PICU length<br>of stay                                               |                                                                                                                                                                                                                                   |
| Browne et al/1997(30)   | RCT | Australia | Intravenous salbutamol vs placebo                                                                                  | 29<br>1 – 12<br>years | Number of persistent moderate to severe asthma symptoms 2 hours after randomization, Time to no longer requiring inhaled salbutamol every 30min                               |                                                                                                  | Rate of early discharge from the pediatric emergency centre.<br>Respiratory rate,<br>Heart rate,<br>Oxygen saturations,<br>Blood pressure,<br>vomiting,<br>nausea,<br>headache,<br>seizures,<br>palpitations,<br>tremor, toxicity |
| Browne et al/ 2002 (31) | RCT | Australia | Intravenous salbutamol vs nebulized Ipratropium bromide vs Intravenous salbutamol plus inhaled ipratropium bromide | 55<br>1-14 years      | Emergency department length of stay, mean recovery time (time from randomization to no longer requiring nebulized therapy), rate of early discharge from Emergency department | Pulmonary index score > or = 7, persistent moderate to severe asthma 2 hours after randomization |                                                                                                                                                                                                                                   |
| Carter et               | RCT | USA       | Intravenous                                                                                                        | 21                    | Pulmonary                                                                                                                                                                     | Number of                                                                                        | Nausea,                                                                                                                                                                                                                           |

|                               |     |     |                                                    |                         |                                                                                             |                                                                                                        |                                                                                                                                                                                                                                                                                                      |
|-------------------------------|-----|-----|----------------------------------------------------|-------------------------|---------------------------------------------------------------------------------------------|--------------------------------------------------------------------------------------------------------|------------------------------------------------------------------------------------------------------------------------------------------------------------------------------------------------------------------------------------------------------------------------------------------------------|
| al/1993<br>(25)               |     |     | Theophylline<br>vs placebo                         | 5 –<br>18years          | index score,<br>Improvement in forced<br>expiratory<br>volume<br>(FEV1)                     | salbutamol<br>doses,<br>Salbutamol<br>dose (mg),<br>hospital<br>length of<br>stay,<br>adverse<br>event | headache,<br>palpitations,<br>tremor                                                                                                                                                                                                                                                                 |
| Ciarallo et<br>al/2000<br>(3) | RCT | USA | Intravenous<br>Magnesium<br>Sulphate vs<br>placebo | 30<br>6 – 17.9<br>years | Peak<br>expiratory<br>flow rate<br>(PEFR)                                                   | FEV1<br>Forced vital<br>capacity<br>(FVC)<br>Rate of<br>hospitalization                                | Asthma score<br>(Wood-Downe)<br>Number of<br>salbutamol<br>doses<br>Number of<br>atrovent<br>nebulizers<br>Spirometry<br>BP                                                                                                                                                                          |
| Ciarallo et<br>al/1996<br>(1) | RCT | USA | Intravenous<br>Magnesium<br>Sulphate vs<br>placebo | 31<br>6 – 18<br>years   | Degree of<br>improvement<br>in<br>observations<br>and FEV1,<br>PEFR, FVC<br>until<br>110min |                                                                                                        | Hospital length<br>of stay<br>Rates of revisit<br>to Emergency<br>Department/primary health care<br>physician<br>Respiratory rate,<br>Heart rate,<br>Oxygen<br>saturations,<br>Blood Pressure<br>Requirements<br>for admission to<br>ICU,<br>Dizziness,<br>fatigue, change<br>to body<br>temperature |
| Cross,                        | RCT | USA | Intravenous                                        | 20                      | Hospital                                                                                    |                                                                                                        |                                                                                                                                                                                                                                                                                                      |

|                                                                 |     |          |                                             |                    |                                                                                          |                                                                 |                                                                                                                                                                                |
|-----------------------------------------------------------------|-----|----------|---------------------------------------------|--------------------|------------------------------------------------------------------------------------------|-----------------------------------------------------------------|--------------------------------------------------------------------------------------------------------------------------------------------------------------------------------|
| 2012 (11)<br>Clinical<br>Trials<br>Registry<br><i>Withdrawn</i> |     |          | Magnesium Sulphate vs placebo               | 2 – 20 years       | length of stay                                                                           |                                                                 |                                                                                                                                                                                |
| Daengsuwan, 2017 (6)                                            | RCT | Thailand | Intravenous Magnesium Sulphate vs nebulized | 28<br>2 – 15 years | Clinical asthma score Wood Downe, Adverse event                                          | Hospital length of stay                                         |                                                                                                                                                                                |
| D'Avila et al 2007 (17)                                         | RCT | Brazil   | Intravenous aminophylline vs placebo        | 60<br>2 – 5 years  | Hospital length of stay, Disposition of patients after study, Duration of oxygen therapy | Blood pressure, Oxygen saturation, Heart rate, Respiratory rate |                                                                                                                                                                                |
| Devi et al/1997 (9)                                             | RCT | India    | Intravenous Magnesium Sulphate vs placebo   | 47<br>1 – 12 years | Clinical asthma score PEFr Oxygen saturations                                            | Readiness for discharge                                         | Hypotension, warmth, numbness, respiratory depression Accessory muscle use, dyspnoea and color Wheezing Stroke volume and heart rate, pulses paradoxes respiratory rate, Pulse |
| DiGiulio et al/1993                                             | RCT | USA      | Intravenous Theophylline                    | 29<br>2 – 16       | Number of hospital                                                                       | Nu of doses of nebulized                                        | Heart rate, BP Tremor,                                                                                                                                                         |

|                           |     |        |                                                             |                     |                                                 |                                |                                                                                                                                                                                                                                                                                                             |
|---------------------------|-----|--------|-------------------------------------------------------------|---------------------|-------------------------------------------------|--------------------------------|-------------------------------------------------------------------------------------------------------------------------------------------------------------------------------------------------------------------------------------------------------------------------------------------------------------|
| (26)                      |     |        | vs placebo                                                  | years               | hours elapsed prior to asthma score of < or = 2 | B2 Spirometry<br>Adverse event | wheezing, accessory muscle use                                                                                                                                                                                                                                                                              |
| Edmunds et al 1981(21)    | RCT | UK     | Intravenous aminophylline vs Intravenous salbutamol vs both | 29<br>3 – 14 years  | PEFR                                            |                                | Stroke volume and cardiac output<br>Pulses paradoxus                                                                                                                                                                                                                                                        |
| Gurkan et al/1999 (4)     | RCT | Turkey | Intravenous Magnesium Sulphate vs placebo                   | 20<br>6 – 16 years  | Clinical asthma scores at 30min<br>PEFR         |                                | Salbutamol dose (mg)<br>Short acting beta 2 agonist requirement<br>Requirement for steroids<br>Timing of nebulized therapies<br>PICU admission rate<br>heart rate, blood pressure, flow rate of supplemental O <sub>2</sub> ,<br>Wheezing, breath sounds, cyanosis, accessory muscle use, cerebral function |
| Hambleton et al/1979 (22) | RCT | UK     | Intravenous Aminophylline vs Intravenous                    | 18<br>1 ½ - 7 years | Clinical score not specified                    |                                | Respiratory rate and heart rate                                                                                                                                                                                                                                                                             |

|                                                                       |     |           |                                                                             |                         |                                                                                     |                                                                                                                             |                                                                                                                       |
|-----------------------------------------------------------------------|-----|-----------|-----------------------------------------------------------------------------|-------------------------|-------------------------------------------------------------------------------------|-----------------------------------------------------------------------------------------------------------------------------|-----------------------------------------------------------------------------------------------------------------------|
|                                                                       |     |           | salbutamol                                                                  |                         |                                                                                     |                                                                                                                             |                                                                                                                       |
| Hussein et al/1986(39)                                                | RCT | Amsterdam | Nebulized salbutamol vs Intravenous albuterol                               | 20<br>18 mth – 15 years | Clinical score not specified<br>PEFR<br>Respiratory rate<br>Heart rate<br>Blood gas |                                                                                                                             |                                                                                                                       |
| Ibrahim et al/1993 (18)                                               | RCT | Sudan     | Intravenous aminophylline vs Subcut adrenaline vs nebulized salbutamol      | 120<br>5 – 12 years     | PEFR<br>Respiratory rate, heart rate, blood pressure                                |                                                                                                                             | Tremor                                                                                                                |
| Irazuzta et al/ 2016 (5)                                              | RCT | Paraguay  | Intravenous Magnesium Sulphate bolus vs infusion                            | 38<br>6 – 16 years      | Discharge home at 24hours<br>Treatment costs                                        | Cost implication<br>Hospital length of stay                                                                                 |                                                                                                                       |
| Lemon, 2007 (36)<br>Clinical trials registry<br><i>Status unknown</i> | RCT | USA       | Intravenous Montelukast vs placebo                                          | 52<br>6 -18 years       | Evaluate effect of intravenous of montelukast as adjuvant therapy                   | First dose pharmacokinetic parameters                                                                                       |                                                                                                                       |
| Morris et al/2010 (37)                                                | RCT | USA       | Intravenous Montelukast added to standard therapy vs standard therapy alone | 276<br>6 – 14 years     | Average change in FEV1 (0-60min)                                                    | Modified Pulmonary index score after 60min<br>Number of patients requiring hospitalization or not discharged from Emergency | Average change in FEV1 in 45 min<br>Average change in FEV1 in 2hours<br>Rate of hospitalization<br>Oxygen saturations |

|                                 |     |        |                                             |                             |                                                                                                                                          |                                             |                                                                                             |
|---------------------------------|-----|--------|---------------------------------------------|-----------------------------|------------------------------------------------------------------------------------------------------------------------------------------|---------------------------------------------|---------------------------------------------------------------------------------------------|
|                                 |     |        |                                             |                             |                                                                                                                                          | department<br>in 2hours                     |                                                                                             |
| Nao et al/<br>2007 (20)         | RCT | Korea  | Intravenous<br>aminophylline<br>vs placebo  | 50<br>2 – 15<br>years       | Change in<br>clinical<br>asthma<br>severity<br>score over<br>time                                                                        |                                             | Adverse event<br>Wheezing                                                                   |
| Needleman<br>et al/1995<br>(28) | RCT | USA    | Intravenous<br>Aminophyllin<br>e vs placebo | 42<br>2 – 18<br>years       | Mean length<br>of stay<br>Change to<br>clinical<br>asthma<br>severity<br>score                                                           | Spirometry<br>Readiness<br>for<br>discharge | Oxygen<br>saturations                                                                       |
| Nuhoglu<br>et al/ 1998<br>(14)  | RCT | Turkey | Intravenous<br>aminophylline<br>vs placebo  | 38<br>2 – 16<br>years       | Change in<br>clinical<br>asthma<br>score over<br>24 hours<br>Mean<br>number of<br>nebulization<br>s of<br>salbutamol<br>over 24<br>hours | Spirometry<br>Adverse<br>event              |                                                                                             |
| Pierson et<br>al/ 1971<br>(19)  | RCT | USA    | Intravenous<br>aminophylline<br>vs placebo  | 23<br>5 – 17<br>years       | Clinical<br>asthma<br>score<br>FVC                                                                                                       |                                             | Blood gas<br>Need for<br>invasive<br>ventilation                                            |
| Ream et<br>al/2001<br>(27)      | RCT | USA    | Intravenous<br>Theophylline<br>vs placebo   | 47<br>13 mths –<br>17 years | PICU length<br>of stay<br>Asthma<br>score to less<br>3                                                                                   | Hospital<br>length of<br>stay               | Hours on<br>continous<br>nebulised<br>albuterol<br>Respiratory rate<br>Need for<br>invasive |

|                         |     |        |                                                     |                                |                                                                                                                        |                                                                              |                                                                                                                                                        |
|-------------------------|-----|--------|-----------------------------------------------------|--------------------------------|------------------------------------------------------------------------------------------------------------------------|------------------------------------------------------------------------------|--------------------------------------------------------------------------------------------------------------------------------------------------------|
|                         |     |        |                                                     |                                |                                                                                                                        |                                                                              | ventilation<br>Vomiting,<br>nausea,<br>abdominal pain,<br>headache,<br>seizures, tremor,<br>irritability                                               |
| Roberts et al/2003 (23) | RCT | UK     | Intravenous salbutamol vs Intravenous aminophylline | 44<br>1 – 16 years             | Asthma severity score 2 hours post treatment<br>Hospital length of stay<br>Duration of oxygen therapy<br>Adverse event | Need for additional second line therapies<br>Duration of Intravenous therapy | Oxygen saturations<br>Intubation<br>Vomiting and Nausea<br>Abdominal pain                                                                              |
| Santana et al 2001 (13) | RCT | Brazil | Intravenous Mgs04 vs salbutamol vs placebo          | 50<br>2 – upper age not listed | Respiratory rate, BP                                                                                                   |                                                                              | Number of atrovent nebulisations<br>Hospital length of stay<br>PICU length of stay<br>Heart rate,<br>Oxygen saturations,<br>duration of oxygen therapy |
| Scarfone et al/2000 (8) | RCT | USA    | Single dose Intravenous Mg S04 vs placebo           | 54<br>1 – 18y years            | Pulmonary index score improvement over 120min<br>Determined                                                            | Rate of hospitalization<br>Readiness for discharge                           | Need for albuterol<br>Heart rate, BP<br>Facial flushing<br>Hypotension and vomiting                                                                    |

|                         |     |       |                                                                                                  |                       |                                                                          |                                                                                                                                                                                                                            |                                                           |
|-------------------------|-----|-------|--------------------------------------------------------------------------------------------------|-----------------------|--------------------------------------------------------------------------|----------------------------------------------------------------------------------------------------------------------------------------------------------------------------------------------------------------------------|-----------------------------------------------------------|
|                         |     |       |                                                                                                  |                       | by investigator<br>s to require<br>hospitalizati<br>on at 120<br>minutes |                                                                                                                                                                                                                            |                                                           |
| Singhi et al/ 2014 (12) | RCT | India | Intravenous Magnesium Sulphate vs Terbutaline vs Aminophylline                                   | 100<br>1 -12<br>years | Reduction in Clinical Asthma severity score of 4 or more points          | Trends in the CAS score over 12 hours<br>Frequency of adverse events<br>Number of hours from enrolment to resolution of wheeze, dyspnoea, retraction.<br>Number of patients with wheeze, dyspnoea and retraction at 1 hour | Wheezing<br>Respiratory rate,<br>oxygen<br>saturation     |
| Strauss et al/1994 (16) | RCT | USA   | Aminophylline bolus followed by infusion vs placebo in addition to standard care in acute asthma | 31<br>5 – 18<br>years | Total length of hospital stay                                            | Number of albuterol nebulisations in 1 <sup>st</sup> 24 hours<br>PEFR (peaked expiratory flow rates)<br>Frequency of adverse                                                                                               | Wheezing,<br>Respiratory rate<br>and Oxygen<br>saturation |

|                            |                                        |           |                                                              |                        |                                                           |                                                                                                                         |                     |
|----------------------------|----------------------------------------|-----------|--------------------------------------------------------------|------------------------|-----------------------------------------------------------|-------------------------------------------------------------------------------------------------------------------------|---------------------|
|                            |                                        |           |                                                              |                        |                                                           | events<br>Arrhythmia<br>Vomiting,<br>nausea,<br>abdominal<br>pain,<br>headache,<br>seizures,<br>palpitations            |                     |
| Tiwari et al 2016 (35)     | RCT                                    | India     | Intravenous Ketamine vs Intravenous aminophyline             | 48<br>1 – 12<br>years  | Change in PRAM score                                      | Oxygen saturation<br>Hospital length of stay<br>Hypertension<br>Need for invasive ventilation<br>Change in P02 and PC02 | Adverse event       |
| Torres et al/2012 (2)      | RCT                                    | Argentina | Standard protocol vs protocol including magnesium sulphate   | 143<br>2 – 15<br>years | Requirement for mechanical ventilation<br>Intubation      | Asthma score Wood and Downe<br>Hospital length of stay<br>PICU length of stay                                           |                     |
| Watanatham et al/2015 (10) | Pilot prospective<br>Intravenous study | Thailand  | Intravenous magnesium sulphate vs inhaled magnesium sulphate | 12<br>2 – 8<br>years   | Asthma severity score at 60 minutes after therapy started | Hospital length of stay                                                                                                 | Adverse event       |
| Wheeler et al/2005         | RCT                                    | USA       | Intravenous terbutaline vs                                   | 40<br>3 – 15           | Improvement in CAS                                        | PICU stay<br>Requirement                                                                                                | Need for additional |

|                          |     |           |                                                                                      |                        |                                                      |                                                                                                                                                                              |                                                                                                                                                                                                                                                                                                                 |
|--------------------------|-----|-----------|--------------------------------------------------------------------------------------|------------------------|------------------------------------------------------|------------------------------------------------------------------------------------------------------------------------------------------------------------------------------|-----------------------------------------------------------------------------------------------------------------------------------------------------------------------------------------------------------------------------------------------------------------------------------------------------------------|
| (29)                     |     |           | Intravenous aminophylline vs Intravenous aminophylline and terbutaline               | years                  |                                                      | t for mechanical ventilation<br>Arrhythmia                                                                                                                                   | second line therapies<br>Respiratory rate,<br>Oxygen saturation,<br>Blood pressure,<br>Need for supplemental oxygen<br>Arrhythmia,<br>Vomiting and nausea,<br>Headache,<br>Palpitations<br>Treatment costs                                                                                                      |
| Yung and South/1998 (15) | RCT | Australia | Intravenous aminophylline vs placebo in addition to standard therapy in acute asthma | 163<br>1 – 19<br>years | Total length of hospital stay<br>Improvement in FEV1 | Improvement in FEV1<br>FVC<br>Adverse events<br>Asthma severity score<br>Number of salbutamol dose<br>Dose in mg of salbutamol<br>PICU length of stay<br>PICU admission rate | Maximum mid-expiratory volume<br>Area under the peak pressure time curve<br>Irritability and tremor<br>Headache,<br>Seizures,<br>Nausea,<br>vomiting<br>Duration of mechanical ventilation<br>Flow rate of supplemental oxygen<br>Duration of supplemental oxygen<br>Respiratory rate,<br>heart rate.<br>Oxygen |

|                        |     |       |                                    |                        |                   |  |                                                  |
|------------------------|-----|-------|------------------------------------|------------------------|-------------------|--|--------------------------------------------------|
|                        |     |       |                                    |                        |                   |  | saturations                                      |
| Zhang et al /2004 (38) | RCT | China | Intravenous doxofylline vs placebo | 166<br>6 mth – 8 years | Wheezing at 30min |  | Adverse event<br>Respiratory rate and heart rate |



## Papers and studies included in this review

1. Ciarallo L, Sauer AH, Shannon MW. Intravenous magnesium therapy for moderate to severe pediatric asthma: Results of a randomized, placebo-controlled trial. *Journal of Pediatrics*. 1996;129(6):809-14.
2. Torres S, Sticco N, Bosch JJ, Iolster T, Siaba A, Rocca Rivarola M, et al. Effectiveness of magnesium sulfate as initial treatment of acute severe asthma in children, conducted in a tertiary-level university hospital: a randomized, controlled trial. *Archivos Argentinos de Pediatría*. 2012;110(4):291-6.
3. Ciarallo L, Brousseau D, Reinert S. Higher-dose intravenous magnesium therapy for children with moderate to severe acute asthma. *Archives of Pediatrics and Adolescent Medicine*. 2000;154(10):979-83.
4. Gurkan F, Haspolat K, Bosnak M, Dikici B, Derman O, Ece A. Intravenous magnesium sulphate in the management of moderate to severe acute asthmatic children nonresponding to conventional therapy. *European journal of emergency medicine : official journal of the European Society for Emergency Medicine*. 1999;6(3):201-5.
5. Irazuzta J, Paredes F, Pavlicich V, Dominguez S. High-Dose Magnesium Sulfate Infusion for Severe Asthma in the Emergency Department: Efficacy Study. *Pediatric Critical Care*. 2016;17:29-33.
6. Daengsuwan, T and Watanatham, S. A comparative pilot study of the efficacy and safety of nebulized magnesium sulfate and intravenous magnesium sulfate in children with severe acute asthma. *Asian Pacific Journal of Allergy and Immunology*. 2017;35:108-12.
7. Alansari. World Health Organization International Clinical Trials Registry Platform (ICTRP). 2015. NCT02455687. Two Doses of the Intravenous Magnesium Sulfate Versus the Standard Single Dose ,With/ Without the Nebulized Budesonide For the Management of the Severe Asthma Exacerbation in the Emergency Room; A Randomized Controlled Trial. Available at <http://apps.who.int/trialsearch/Trial2.aspx?TrialID=NCT02455687> [Internet]. [cited 20/12/2016].
8. Scarfone R, Loiselle J, Joffe M, Mull C, Stiller S, Thompson K, et al. A randomized trial of magnesium in the emergency department treatment of children with asthma. *Annals of emergency medicine* [Internet]. 2000; 36(6):[572-8 pp.]. Available from: <http://onlinelibrary.wiley.com/o/cochrane/clcentral/articles/647/CN-00330647/frame.html>.
9. Devi P, Kumar L, Singhi S, Prasad R, Singh M. Intravenous magnesium sulfate in acute severe asthma not responding to conventional therapy. *Indian pediatrics* [Internet]. 1997; 34(5):[389-97 pp.]. Available from: <http://onlinelibrary.wiley.com/o/cochrane/clcentral/articles/303/CN-00144303/frame.html>.

10. Watanatham S, Pongsamart G, Vangveeravong M, Daengsuwan T. Comparison efficacy and safety of inhaled magnesium sulfate to intravenous magnesium sulfate in childhood severe asthma exacerbation. *Journal of Allergy and Clinical Immunology*. 2015;1):AB241.
11. Cross. World Health Organization International Clinical Trials Registry Platform (ICTRP). 2012. NCT01522040. A Pilot Study of Magnesium Infusions (Drips) for Moderate-to-Severe Pediatric Asthma Exacerbations. Available at <http://apps.who.int/trialsearch/Trial2.aspx?TrialID=NCT01522040> [Internet]. [cited 20/12/2016].
12. Singhi S, Grover S, Bansal A, Chopra K. Randomised comparison of intravenous magnesium sulphate, terbutaline and aminophylline for children with acute severe asthma. *Acta Paediatrica, International Journal of Paediatrics*. 2014;103(12):1301-6.
13. Santana J, Barreto S, Piva J, Garcia P. Randomized clinical trial of intravenous magnesium sulfate versus salbutamol in the early management of severe acute asthma in children. [Portuguese]. *Jornal de pediatria* [Internet]. 2001; 77(4):[279-87 pp.]. Available from: <http://onlinelibrary.wiley.com/o/cochrane/clcentral/articles/987/CN-00424987/frame.html>.
14. Nuhoğlu Y, Dai A, Barlan I, Başaran M. Efficacy of aminophylline in the treatment of acute asthma exacerbation in children. *Annals of allergy, asthma & immunology : official publication of the American College of Allergy, Asthma, & Immunology* [Internet]. 1998; 80(5):[395-8 pp.]. Available from: <http://onlinelibrary.wiley.com/o/cochrane/clcentral/articles/729/CN-00687729/frame.html>.
15. Yung M, South M. Randomised controlled trial of aminophylline for severe acute asthma. *Archives of Disease in Childhood*. 1998;79(5):405-10.
16. Strauss RE, Wertheim DL, Bonagura VR, Valacer DJ. Aminophylline therapy does not improve outcome and increases adverse effects in children hospitalized with acute asthmatic exacerbations. *Pediatrics*. 1994;93(2):205-10.
17. D'Avila R, Piva J, Marostica P, Amantea S. Early administration of two intravenous bolus of aminophylline added to the standard treatment of children with acute asthma. *Respiratory medicine* [Internet]. 2008; 102(1):[156-61 pp.]. Available from: <http://onlinelibrary.wiley.com/o/cochrane/clcentral/articles/992/CN-00636992/frame.html>.
18. Ibrahim SA, Elgurashi ED, Elkarim OA. Comparative study of intravenous aminophylline subcutaneous adrenaline and nebulised salbutamol in the treatment of acute asthma in children. *Pediatric Reviews and Communications*. 1993;7(3):175-82.
19. Pierson W, Bierman C, Stamm S, VanArsdal P. Aminophylline in status asthmatics. *Journal of Pediatrics* 1971;48:642.
20. Nao M, Katsunuma T, Kim K, Fujisawa T. Efficacy and safety of intravenous aminophylline in children with acute exacerbation of asthma: a multicenter randomized trial. 2007.
21. Edmunds ATaSG. Cardiovascular response during severe acute asthma and its treatment in children. *Thorax*. 1981;36(7):534-40.
22. Hambleton G, Stone M. Comparison of IV salbutamol with IV aminophylline in the treatment of severe, acute asthma in childhood. *Archives of disease in childhood* [Internet]. 1979; 54(5):[391-2 pp.]. Available from: <http://onlinelibrary.wiley.com/o/cochrane/clcentral/articles/042/CN-00021042/frame.html>.

23. Roberts G, Newsom D, Gomez K, Raffles A, Saglani S, Begent J, et al. Intravenous salbutamol bolus compared with an aminophylline infusion in children with severe asthma: a randomised controlled trial. *Thorax*. 2003;58(4):306-10.
24. Bien J, Bloom M, Evans R, Specker B, O, Brien Kevin. Intravenous theophylline in pediatric status asthmaticus. A prospective, randomized, double-blind, placebo-controlled trial. *Clinical Pediatrics*. 1995;34(9):475-81.
25. Carter E, Cruz M, Chesrown S, Shieh G, Reilly K and Hendeles L. Efficacy of intravenously administered theophylline in children hospitalised with severe asthma. *Journal of Pediatrics*. 1993;122(3):470-6.
26. DiGiulio G, Kerckmar C, Krug S, Alpert, S, Marx C. Hospital treatment of asthma: lack of benefit from theophylline given in addition to nebulized albuterol and intravenously administered corticosteroid. *Journal of Pediatrics*. 1993;122(3):464-9.
27. Ream R, Loftis L, Albers G, Becker B, Lynch R, Mink R. Efficacy of IV Theophylline in Children with Severe Status Asthmaticus. *Chest*. 2001;119(5).
28. Needleman J, Kaifer M, Nold J, Shuster P, Redding M, Gladstein J. Theophylline does not shorten hospital stay for children admitted for asthma. *Archives of pediatrics & adolescent medicine* [Internet]. 1995; 149(2):[206-9 pp.]. Available from: <http://onlinelibrary.wiley.com/o/cochrane/clcentral/articles/230/CN-00110230/frame.html>.
29. Wheeler D, Jacobs B, Kenreigh C, Bean J, Hutson T, Brill R. Theophylline versus terbutaline in treating critically ill children with status asthmaticus: a prospective, randomized, controlled trial. *Pediatric Critical Care Medicine*. 2005;6(2):142-7.
30. Browne G, Penna A, Phung X, Soo M. Randomised trial of intravenous salbutamol in early management of acute severe asthma in children. *Lancet* (London, England) [Internet]. 1997; 349(9048):[301-5 pp.]. Available from: <http://onlinelibrary.wiley.com/o/cochrane/clcentral/articles/441/CN-00136441/frame.html>.
31. Browne G, Trieu L, Asperen P. Randomized, double-blind, placebo-controlled trial of intravenous salbutamol and nebulized ipratropium bromide in early management of severe acute asthma in children presenting to an emergency department. *Critical care medicine* [Internet]. 2002; 30(2):[448-53 pp.]. Available from: <http://onlinelibrary.wiley.com/o/cochrane/clcentral/articles/670/CN-00378670/frame.html>.
32. Boeschoten S. World Health Organization International Clinical Trials Registry Platform (ICTRP). 2017. NCT03493503. Efficacy of Loading Dose of IV Salbutamol in Children Admitted to a PICU for Severe Acute Asthma or Severe Acute Wheeze. Available at <https://clinicaltrials.gov/show/NCT03493503> (cited 15/09/2018).
33. Bogie A, Towne D, Luckett P, Abramo T, Wiebe R. Comparison of intravenous terbutaline versus normal saline in pediatric patients on continuous high-dose nebulized albuterol for status asthmaticus. *Pediatric emergency care* [Internet]. 2007; 23(6):[355-61 pp.]. Available from: <http://onlinelibrary.wiley.com/o/cochrane/clcentral/articles/189/CN-00610189/frame.html>.

34. Allen J and Macias C. The efficacy of ketamine in pediatric emergency department patients who present with acute severe asthma. *Annals of emergency medicine* [Internet]. 2005; 46(1):[43-50 pp.].
35. Tiwari A, Guglani V, Jat KR. Ketamine versus aminophylline for acute asthma in children: A randomized, controlled trial. *Annals of Thoracic Medicine*. 2016;11(4):283-8.
36. Lemon. World Health Organization International Clinical Trials Registry Platform (ICTRP). 2007. NCT00494572. Pharmacokinetics and Pharmacodynamics of Montelukast in Children, Ages 6 Through 18 Years Old, With Status Asthmaticus Unresponsive to Conventional Treatment. [Internet]. [cited 20/12/2016].
37. Morris C, Becker A, Pi√±ieiro A, Massaad R, Green S, Smugar S, et al. A randomized, placebo-controlled study of intravenous montelukast in children with acute asthma. *Annals of allergy, asthma & immunology : official publication of the American College of Allergy, Asthma, & Immunology* [Internet]. 2010; 104(2):[161-71 pp.]. Available from: <http://onlinelibrary.wiley.com/o/cochrane/clcentral/articles/770/CN-00742770/frame.html>.
38. Zhang JX. Clinical study on doxofylline injection in treatment of children with acute asthma attacks. *Zhonghua Erke Zazhi*. 2004;42(2):143-4.
39. Hussein A, Von d, Muller W, Schell S. Intravenous infusion of reproterol (a beta-2-adrenergic agent) in the treatment of acute severe asthma in children. *Monatsschr-Kinderheilkd* [Internet]. 1986; 134(4):[192-6 pp.]. Available from: <http://onlinelibrary.wiley.com/o/cochrane/clcentral/articles/167/CN-00176167/frame.html>.
